# Supplementary material
Source: PubMed Central journal article supplement (PMC2685757)
Supplement: ddp152_1.pdf [file ddp152_1.pdf]

## **Supplemental Materials**

### **1. Supplemental Figure 1 (RT-PCR results of 39 MIR exons in 10 human tissues).**

In each gel figure, solid arrows show sequencing confirmed MIR exon inclusion forms. Hollow arrows show sequencing confirmed MIR exon skipping forms. Dashed arrows show sequencing confirmed non-specific PCR products.

### **2. Supplemental Figure 2 (Putative splice site signals within consensus sequences of antisense MIR, AluJo, and AluSx).**

A. antisense MIR. B. antisense AluJo. C. antisense AluSx. X-axis, positions of putative splice sites within the consensus sequence. Y-axis, splice site scores calculated by MAXENT (see Materials and Methods). Black circle, 5' splice sites. Red triangle, 3' splice sites. Only putative splice sites with a score of higher than 0 are shown.

### **3. Supplemental Figure 3 (RT-PCR results of 9 MIR exons in fibroblast cells of humans, chimpanzees, rhesus macaques, marmosets and mouse kidney).**

In each gel figure, exon inclusion forms and exon skipping forms are denoted as \* and ^ respectively.

### **4. Supplemental Table 1 (List of primers for RT-PCR analysis of 39 MIR exons in 10 human tissues).**

### **5. Supplemental Table 2 (List of primers for RT-PCR analysis of 9 MIR exons in chimpanzees, rhesus macaques, marmosets and mice).**

# Figure S1

## Constitutive Exons

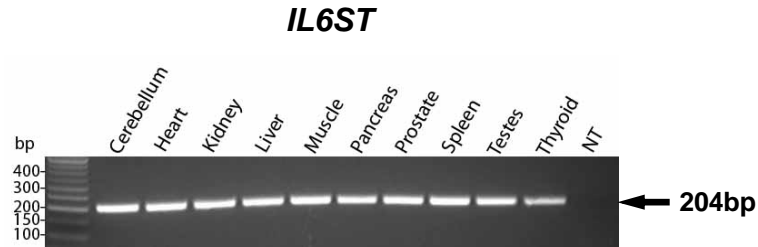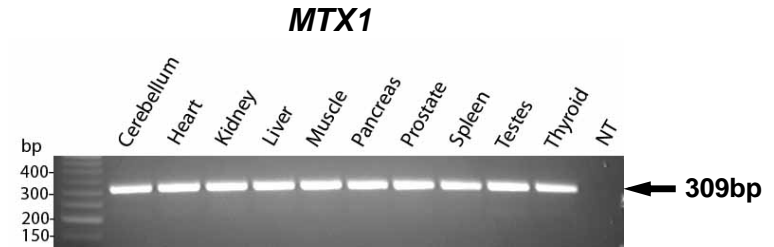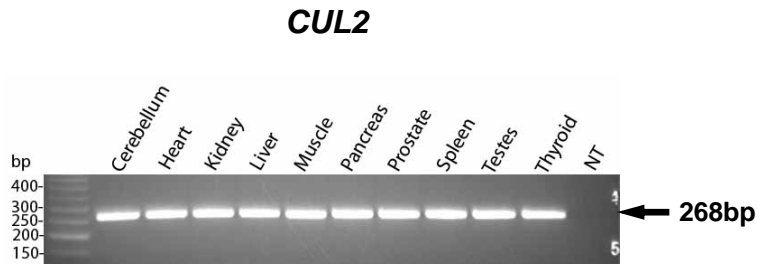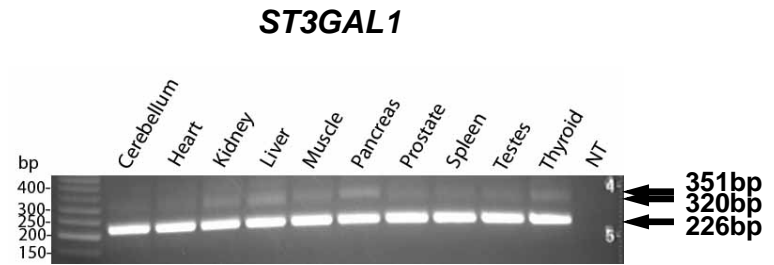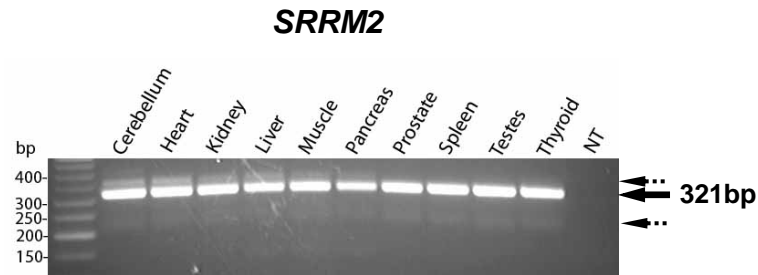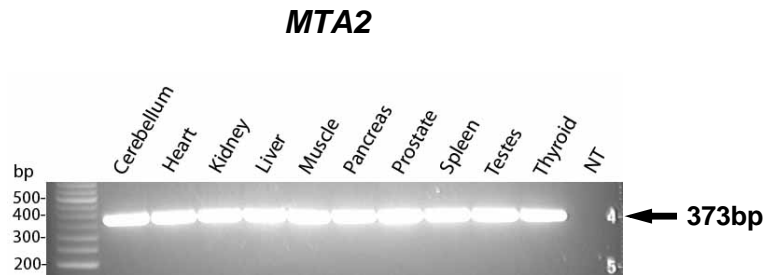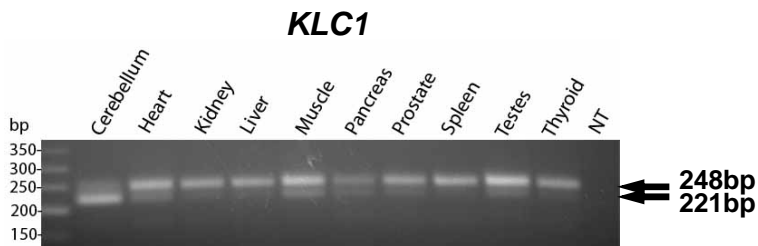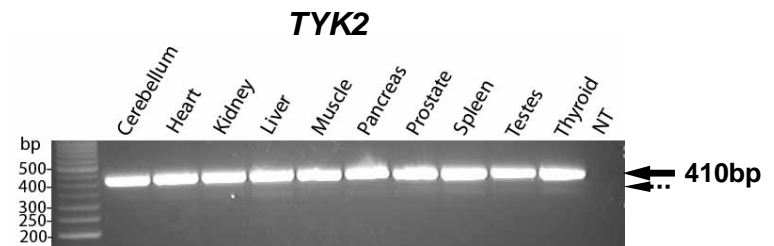

# Constitutive Exons

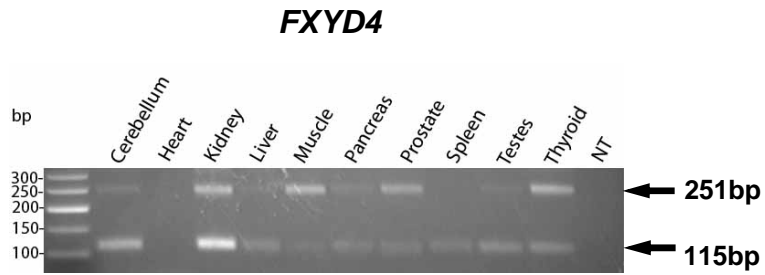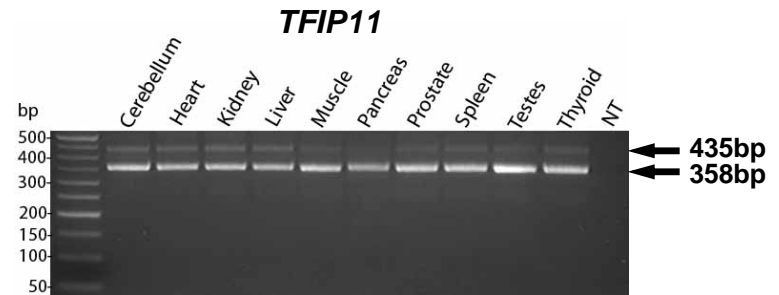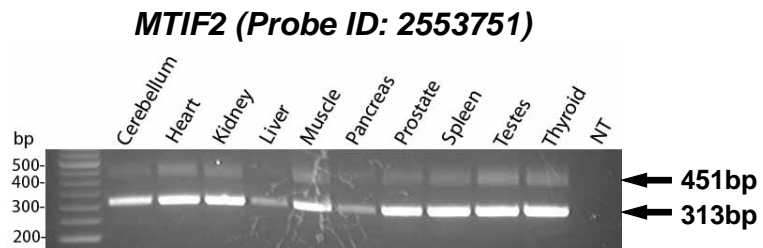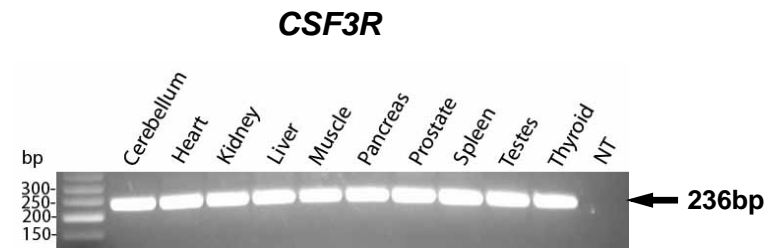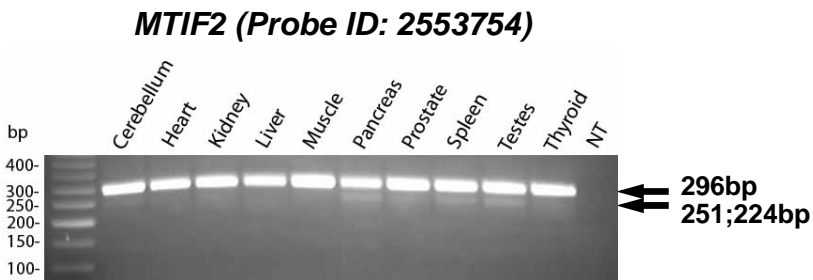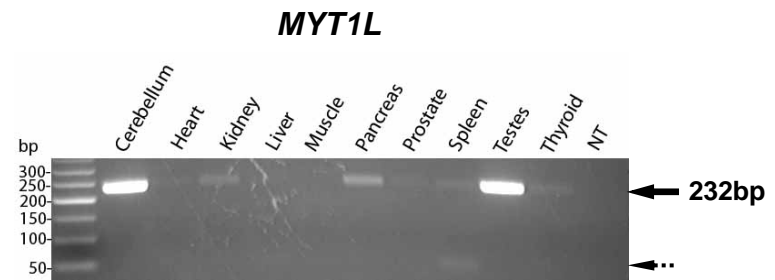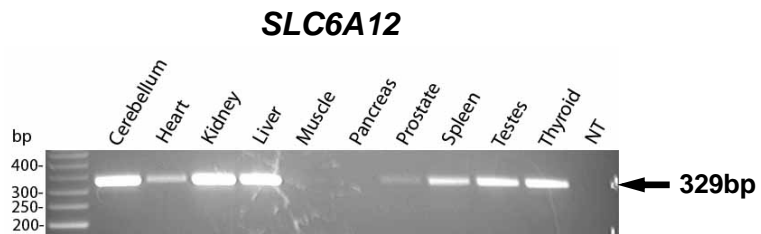

# Alternative Major Exons

## NUMB

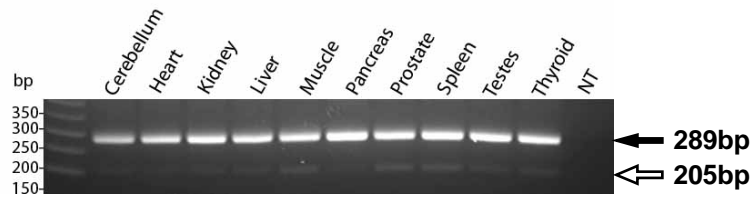

## C12orf52

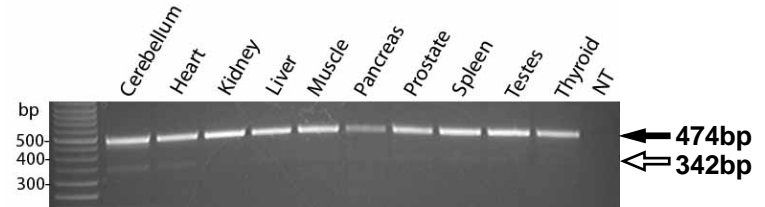

## AY070437

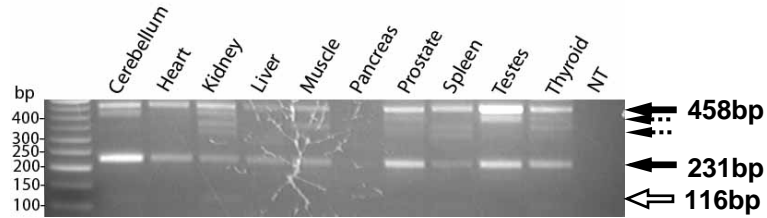

# Alternative Medium Exons

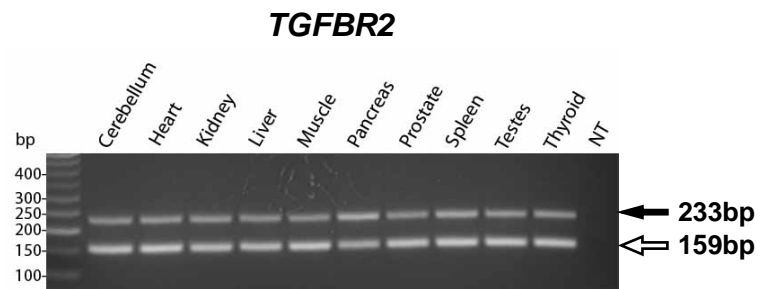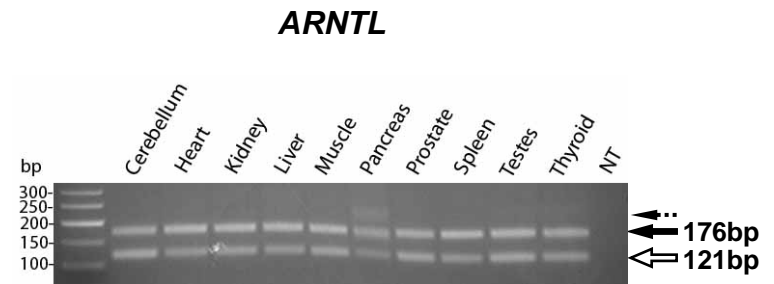

# Alternative Minor Exons

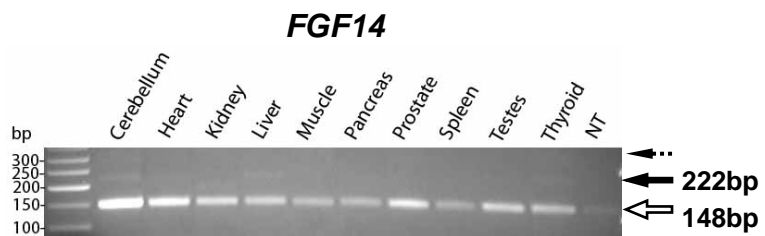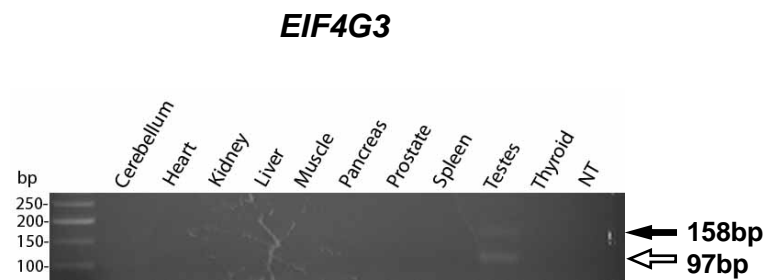

# No Inclusion

**MYO18A**

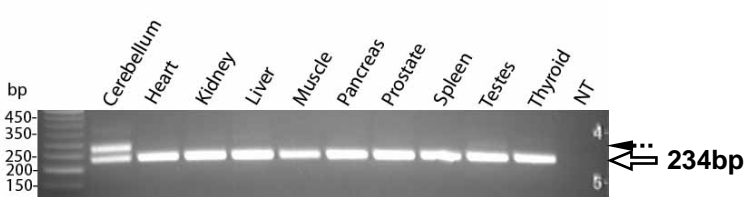

**VWF**

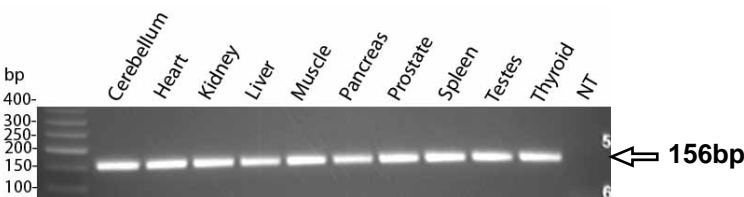

# Tissue Specific Shift in Alternative Splicing

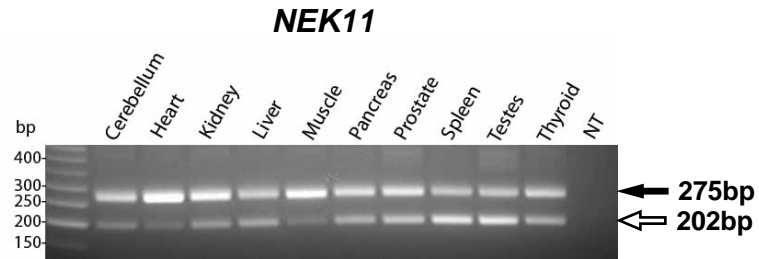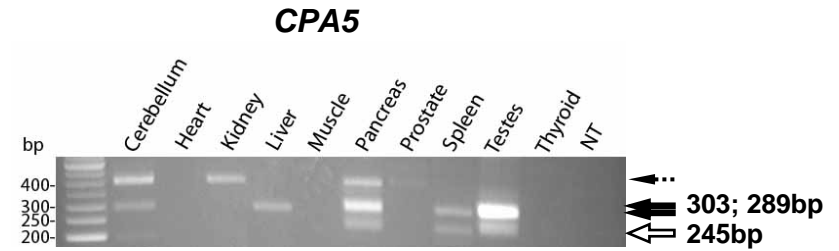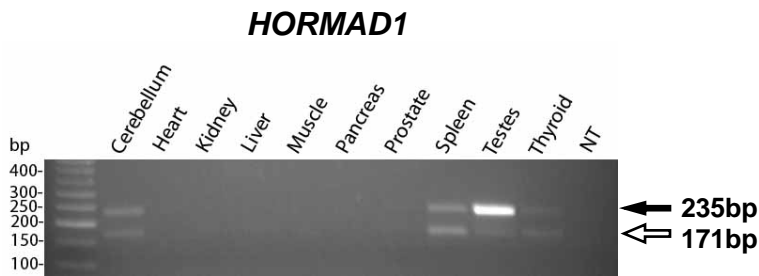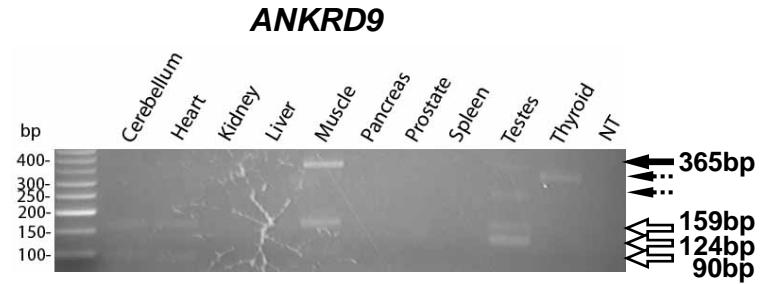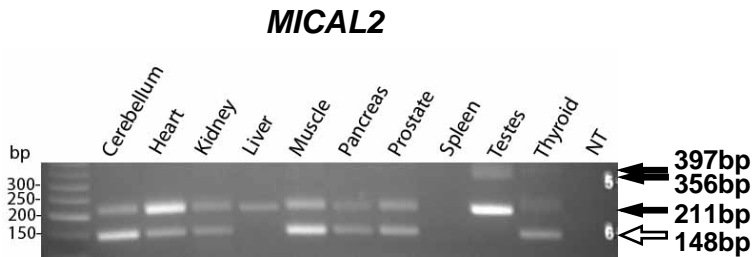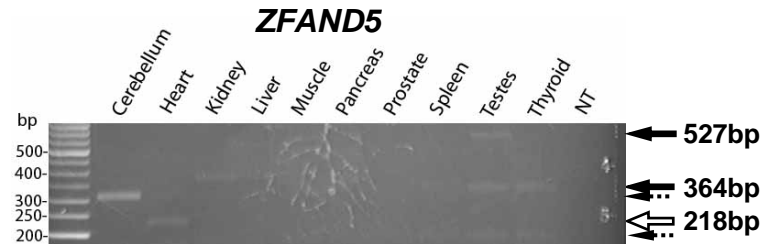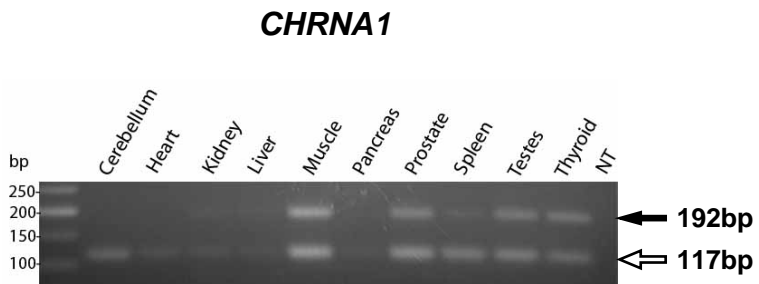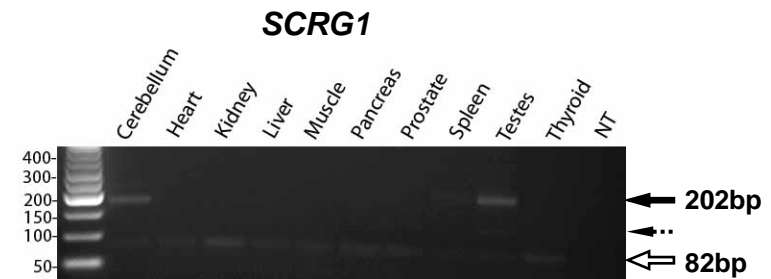



# Tissue Specific Shift in Alternative Splicing

***TLL6***

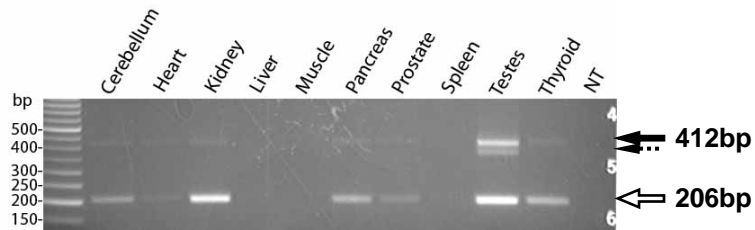

***IL16***

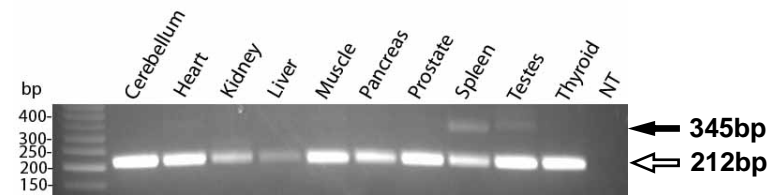

***WSCD2***

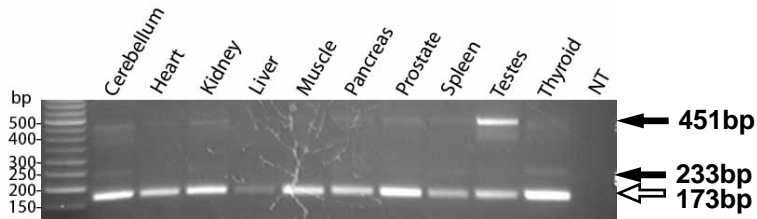

***INPP5J***

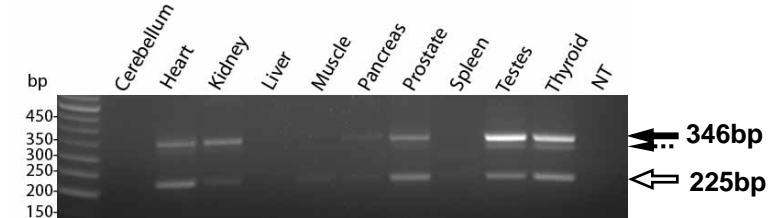

***TUSC3***

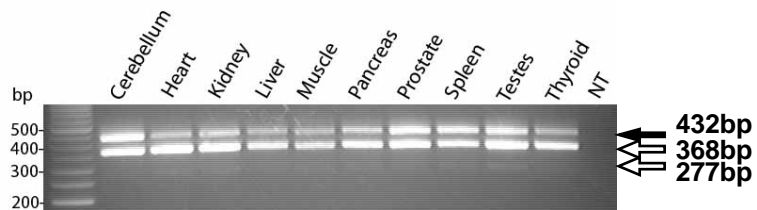

***MUC15***

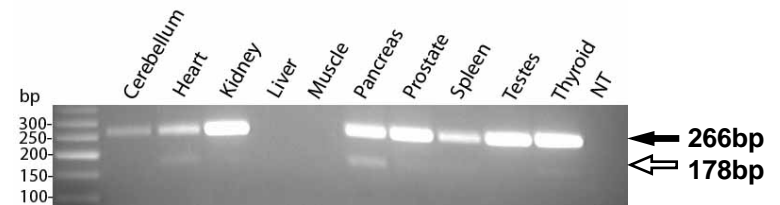

***RGAG1***

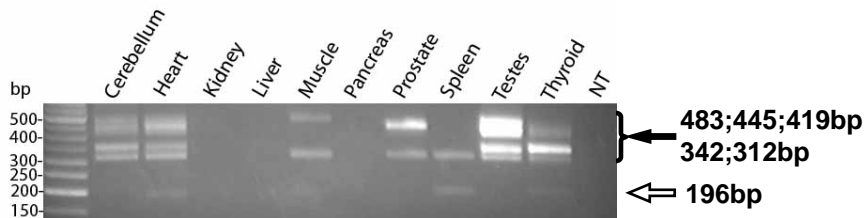

# Figure S2

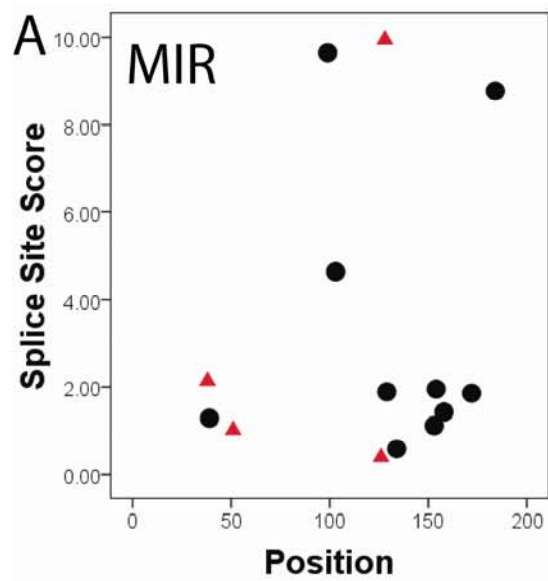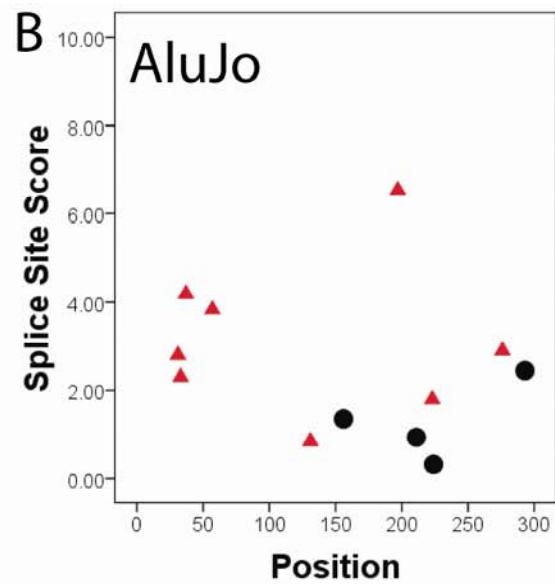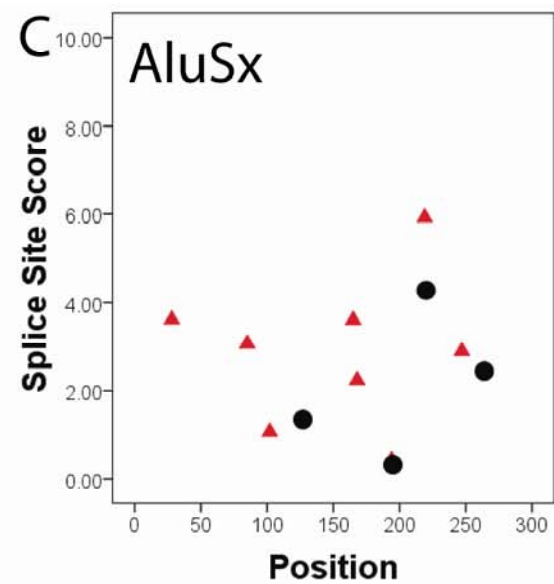

**Figure S3**

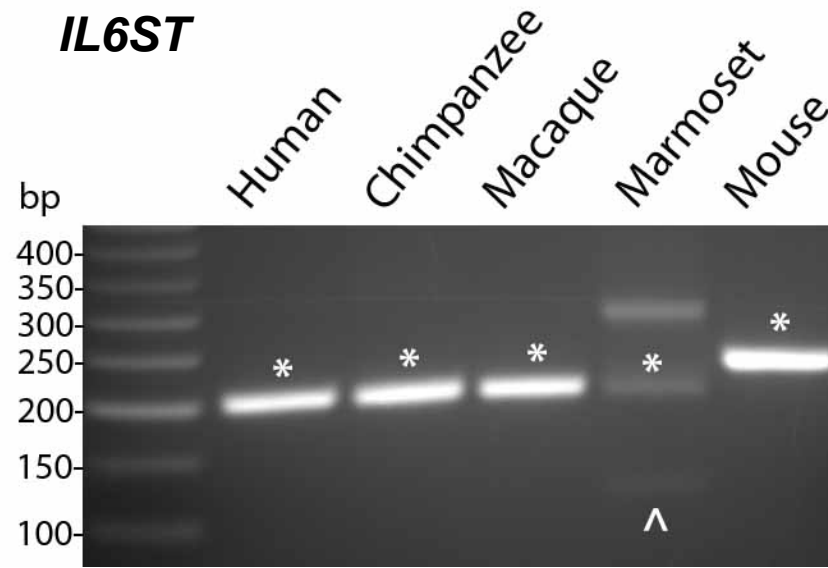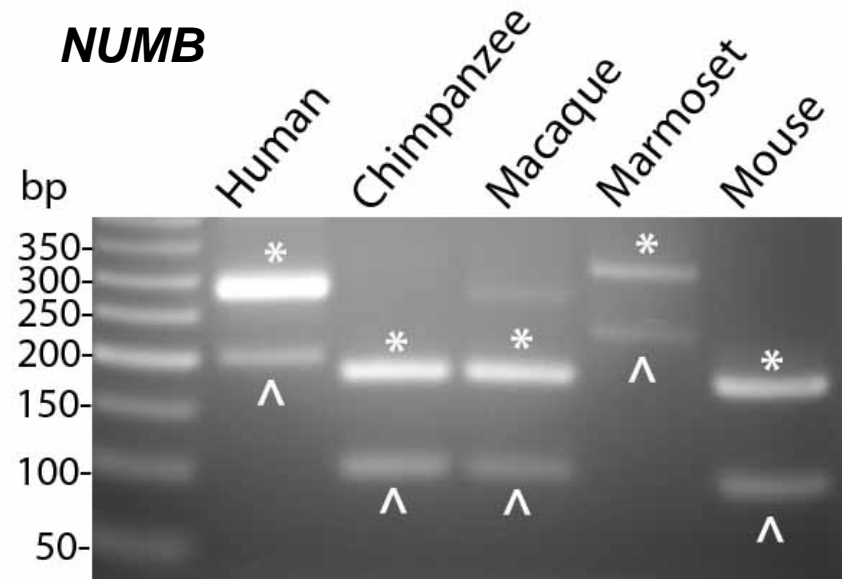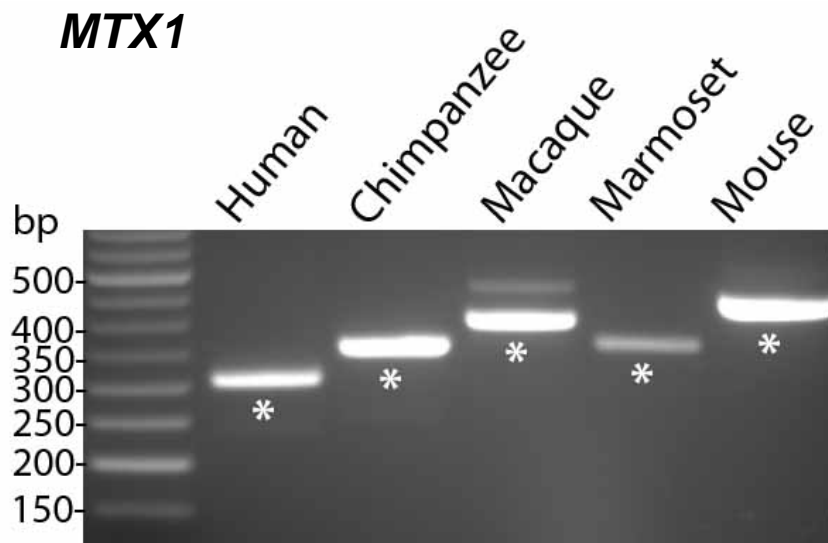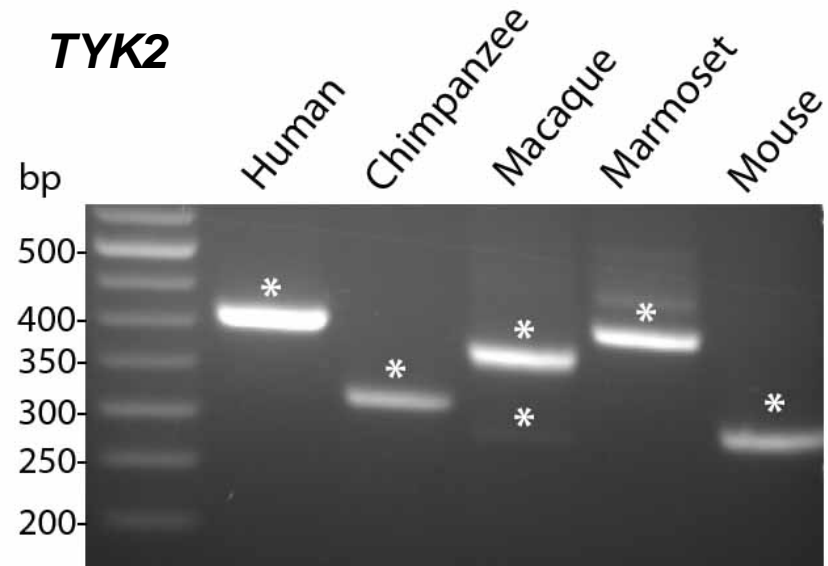

## **MTA2**

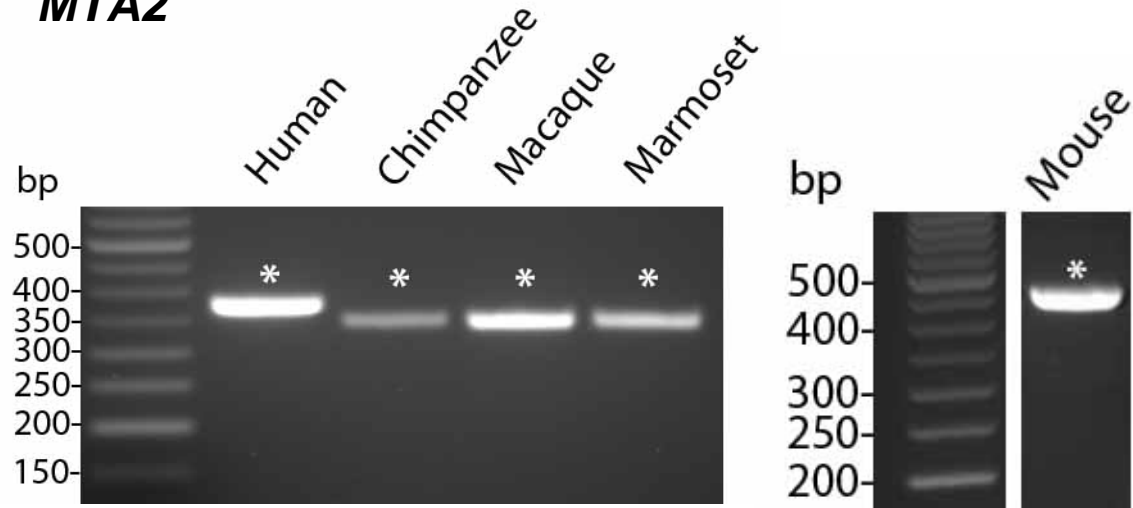

## **SRRM2**

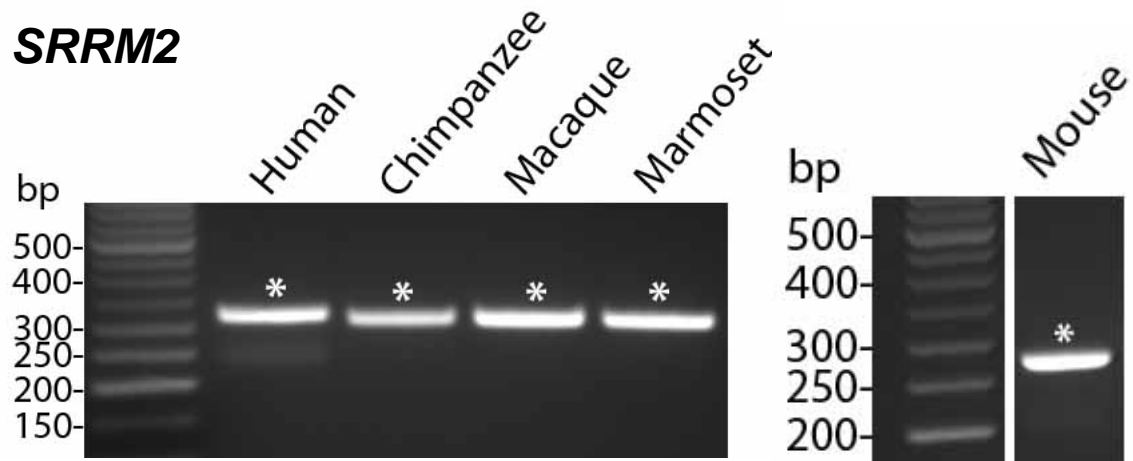

## ***TGFBR2***

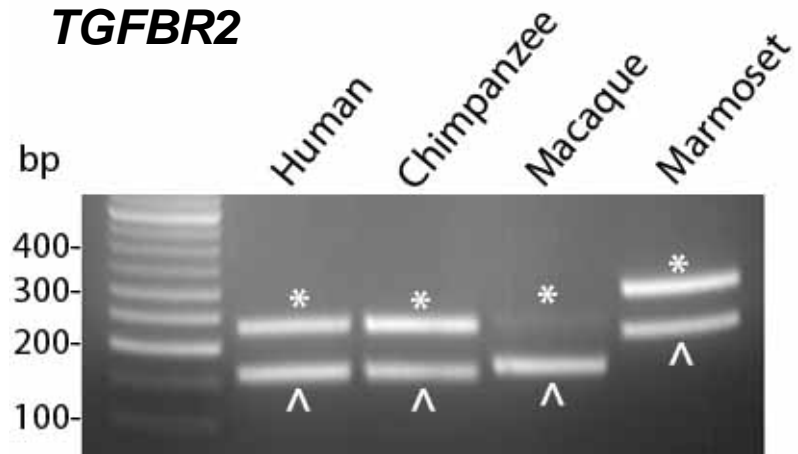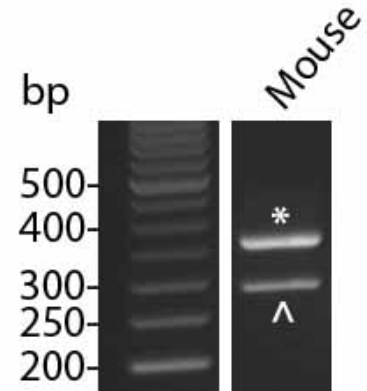

## ***ARNTL***

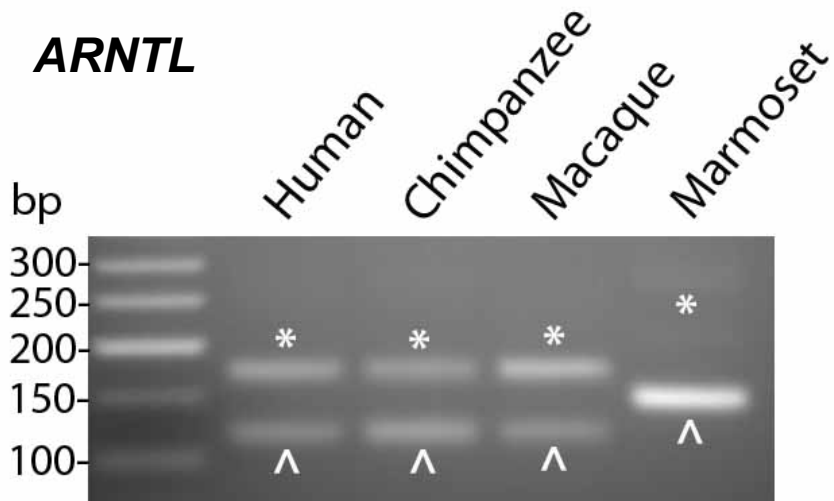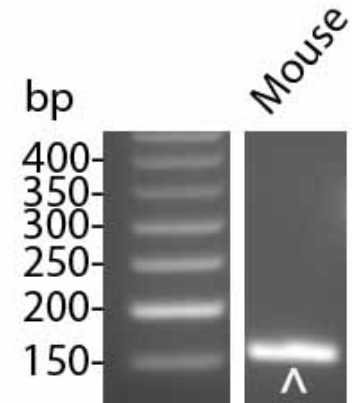

**CUL2**

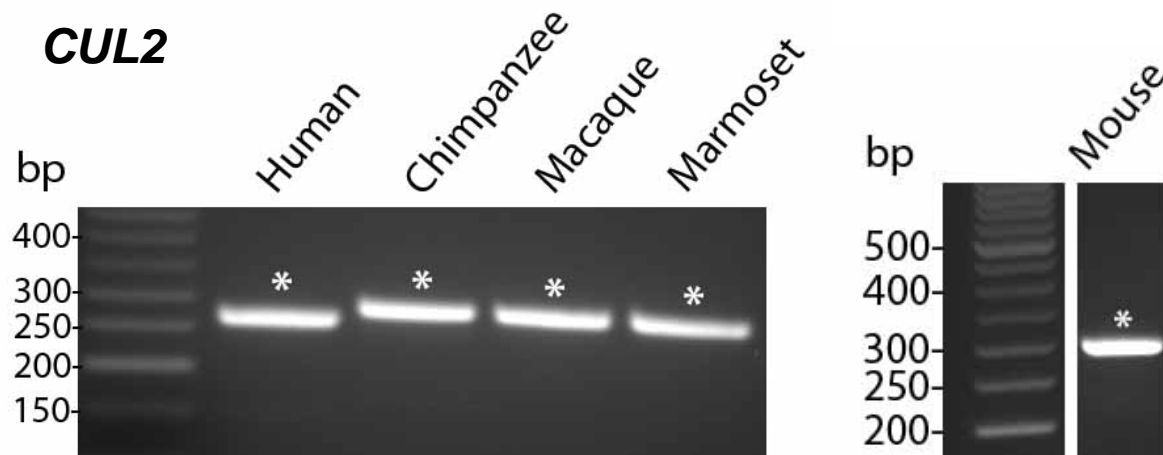

**Table S1: List of primers for RT-PCR analysis of 39 MIR exons in 10 human tissues.**

| <b>Primer Name</b>     | <b>Forward Primer</b> | <b>Reverse Primer</b>     |
|------------------------|-----------------------|---------------------------|
| <i>INPP5J</i>          | GGTTGAAATGGCTGATGACA  | CTTTGCTGGGAGCTGAAAAC      |
| <i>NUMB</i>            | TGCAGCCACTGTTACAATTCA | CGAACGCCTTCTTCATCTGT      |
| <i>IL6ST</i>           | GTTCGTGCGCTGTGGAGA    | CAGTGGTGAGGAAAATAACAAGG   |
| <i>SRRM2</i>           | CGAGGAACAGCAAATTCAGG  | CTTCTTCTGCTTTGGGGTTG      |
| <i>MYO18A</i>          | TAATGGGCACAATGTGGAGA  | CTATGGACCAGCCACACCTT      |
| <i>TLL6</i>            | CATGAGCCGCATGTTAAAGA  | TCATATCCTCCCCTGGTTTG      |
| <i>TGFB2</i>           | CACCGCACGTTTCAAGAAGTC | CACAGATGGAGGTGATGCTG      |
| <i>NEK11</i>           | GTGGTTGCCCTAGTTTGGAG  | CTGCCTCTTGGAAATTCAGC      |
| <i>VWF</i>             | ATGATTCCTGCCAGATTTGC  | GCTGTACATGCTCCCATCAA      |
| <i>CUL2</i>            | TGCAGAAAGACACACCACAA  | CACGCGACGTAGCTGTATTC      |
| <i>HORMAD1</i>         | TGCACTGGTATTTCCAATAAG | CTGTAAAGCATCATAACATCCTAGC |
| <i>MICAL2</i>          | TGATCCAGCTGCTTCTTCT   | CTGGGCCTTAGGTCTGTGAT      |
| <i>WSCD2</i>           | TGAGTTCAACCGCAAGTACG  | GCTTCAGGTCTTCAAAGTGC      |
| <i>ST3GAL1</i>         | TTGGGTCAGGACAATCCAT   | CCAAGTGTGGTTTCTGACGA      |
| <i>MTA2</i>            | AGAAACCAGCTGTCCCAGAA  | CCTCCAGGACAATAGGCTCA      |
| <i>MTX1</i>            | TGTCTGACCCTGCTCTCTCA  | CAGTCTGCCAGCACAGATA       |
| <i>KLC1</i>            | CCCTGAGAACATGGAGAAGC  | GCAGCACTGGAGAGAGAAGG      |
| <i>CHRNA1</i>          | GATCGTGACAACCAATGTGC  | CGCCAGATCTTTTCTGAAGG      |
| <i>AY070437</i>        | CGGTTTTATAGCCCTGCTTG  | CAGCAGAATCGCTTGAACCT      |
| <i>SCRGI</i>           | GAAGATGGACGGAGGAAACA  | AGGGTGAAGTATGATGCCACCT    |
| <i>EIF4G3</i>          | CTGCACATTACAAAGGGGAAT | GAGACAGCGGGAGTGAAGAT      |
| <i>ANKRD9</i>          | TCCGTGCTGGGACCTTTG    | TCACCTAGTTCGGGGATGT       |
| <i>RGAG1</i>           | CCGCCCTACTGACTGTGAAT  | AAGGCCATCTGCTTGTTTTG      |
| <i>ZFAND5</i>          | TGCAGGAACAAAGGAAGAC   | CGGGTCTGGTTAGTCTC         |
| <i>FXD4</i>            | GTGAGCCCTCGCCAAG      | AGCCACGGATCTGCTC          |
| <i>MTIF2 (2553751)</i> | ACCCTTCTGGATTTCCGTTT  | AGATAAAGCAGCCCCAGTGA      |
| <i>CPA5</i>            | AGAGTCCCTGAAGCCAGGAT  | GCTGAAGACCAGGAGTGTCC      |
| <i>SLC6A12</i>         | CTTGGCTTTCCATAAGCAG   | GGTCTCGTCTTCCCTGGTC       |
| <i>TYK2</i>            | CTTGGATGGGAGCACCTG    | CAATGTGGATGCAGACTTCC      |
| <i>TUSC3</i>           | GAAAGGCGATGTTGGAAAAA  | TGGCACACACTGAATATAACAGG   |
| <i>TFIP11</i>          | GTGTAGGAGCGGCGTCTTC   | CTGTGCGTTGGGGTTGAA        |
| <i>CSF3R</i>           | GGGGAGAGAAGCTGGACTG   | GGGGAGCAGCAGGATGAT        |
| <i>IL16</i>            | GTGTGGGGACGAGATTGTG   | TCCACTGATGCCTCTCCTTT      |
| <i>MYTIL</i>           | GGTTCAGTTGGTCTCACAGA  | GCTTCTCCTCGGTGTCCA        |
| <i>MTIF2 (2553754)</i> | GACCTACCGACCATTCTTCC  | TCAGTGTATCTGGACTCAGCAA    |
| <i>MUC15</i>           | TGCACGACAGATTCCTTCA   | GGCTCCCCGATAGAAGTGA       |
| <i>C12orf52</i>        | GGGTTCTGGGTTTCTGGATT  | CTCCACGGGGTCTTCAT         |
| <i>ARNTL</i>           | GAATCCTGGGCCTTCATTG   | AGATCCAGCTTGGGAGGAGT      |
| <i>FGF14</i>           | GCAGTGTCTTGTGGCAAGA   | GCTGTCATCCTTGGTTCAT       |

**Table S2: List of primers for RT-PCR analysis of 9 MIR exons in chimpanzees, rhesus macaques, marmosets and mice.**

| Gene          | Species    | Forward Primer           | Reverse Primer           | Skipping (bp) | Inclusion (bp) |
|---------------|------------|--------------------------|--------------------------|---------------|----------------|
| <i>ARNTL</i>  | Chimpanzee | GAATCCTGGGCCTTCATTG      | AGATCCAGCTTGGGAGGAGT     | 121           | 176            |
|               | Macaque    | GAATCCTGGGCCTTCATTG      | AGATCCAGCTTGGGAGGAGT     | 121           | 176            |
|               | Marmoset   | TGCTGGCTAGAGTGCATACG     | GGCCTCTGGACTTGTGGT       | 150           | 206            |
|               | Mouse      | CAGTGAATGCTTTTGAACC      | CGATCCAGTGTGGGAGATG      | 165           | None           |
| <i>CUL2</i>   | Chimpanzee | TGCAGAAAAGACACACCACAA    | TGGAGGAGAGCGACATCAC      | None          | 284            |
|               | Macaque    | TGCAGAAAAGACACACCACAA    | TGGAGGAGAGCGACATCAC      | None          | 284            |
|               | Marmoset   | TGCAGAAAAGACACACCACAA    | TGGAGGAGAGCGACATCAC      | None          | 284            |
|               | Mouse      | CGTCAATGCAGAAGGATACG     | ACCAGGAGAAGGTGTCATGC     | None          | 289            |
| <i>IL6ST</i>  | Chimpanzee | GTTTCGTGCGCTGTGGAGA      | CAGTGGTGAGGAAAATAAACAAGG | None          | 204            |
|               | Macaque    | GTTTCGTGCGCTGTGGAGA      | CAGTGGTGAGGAAAATAAACAAGG | None          | 204            |
|               | Marmoset   | GTTTCGTGCGCTGTGGAGA      | CAGTGGTGAGGAAAATAAACAAGG | 117           | 204            |
|               | Mouse      | CAGAGCTTCGAGCCATCC       | CTAGCCAAATCCTTGGTGCT     | None          | 235            |
| <i>MTA2</i>   | Chimpanzee | TGAAACGGGCCTATGAGACT     | ACAGGTGCTCAGTCCTCCAG     | None          | 343            |
|               | Macaque    | TGAAACGGGCCTATGAGACT     | ACAGGTGCTCAATCCTCCAG     | None          | 343            |
|               | Marmoset   | TGAAACGGGCCTATGAGACT     | ACAGGTGCTCAATCCTCCAG     | None          | 343            |
|               | Mouse      | GGCACCTCTGAAACCAAAAA     | TCCCCTAAGATGCTCAATCC     | None          | 440            |
| <i>MTX1</i>   | Chimpanzee | TCTGACCCTGCTCTCTCAGC     | CCGCTGGATGGAGACAAT       | None          | 358            |
|               | Macaque    | CGTCTGGGCTCTCAAAAGTT     | TCCTCTTCATCCTCCTCAGC     | None          | 401            |
|               | Marmoset   | TCTGACCCTGCTCTCTCAGC     | CCCCTGGATGGAGACTAT       | None          | 359            |
|               | Mouse      | GGGAGTGCCTAACCCTTCTC     | GAACGCCATCAGTCCTCTC      | None          | 439            |
| <i>NUMB</i>   | Chimpanzee | CCAGCAATCCTCAGACACCT     | TGGCCTCTGGAACATAAACA     | 105           | 190            |
|               | Macaque    | CCAGCAATCCTCAGACACCT     | TGGCCTCTGGAACATAAACA     | 105           | 190            |
|               | Marmoset   | TGGGAAGGAGTGCCAGTG       | TACATTTTCCAGAGCGAACG     | 235           | 320            |
|               | Mouse      | CAGAGCCACATAGCCACAGA     | GCTTTGCCGTAGTTTGTTC      | 102           | 187            |
| <i>SRRM2</i>  | Chimpanzee | CAGCAAATTCAGGAAAAAGTGG   | CTTCTGCTTTGGGGTTGGT      | None          | 311            |
|               | Macaque    | GTACGAGGAACAGCAAATTCAGGA | GGGGTTGGTGAGCGAGAACT     | None          | 311            |
|               | Marmoset   | CAGCAAATTCAGGAAAAAGTGG   | CTTCTGCTTTGGGGTTGGT      | None          | 311            |
|               | Mouse      | CGACTCATGTTGCTGGAAAA     | GGAGTTGGTGAGCGAGAACT     | None          | 271            |
| <i>TGFBR2</i> | Chimpanzee | CACCGCACGTTCAGAAGTC      | CACAGATGGAGGTGATGCTG     | 159           | 233            |
|               | Macaque    | CACCGCACGTTCAGAAGTC      | TGTGGCTTTTACAGATGGA      | 169           | 243            |
|               | Marmoset   | TTGGGGCTCGGTCTATGA       | TCACAGGTGGAATCTCACA      | 222           | 296            |
|               | Mouse      | GAGAGGGCGAGGAGTAAAGG     | GGACTTCTGGTTGTCGCAAG     | 291           | 365            |
| <i>TYK2</i>   | Chimpanzee | CTTGATGGGAGCACCTG        | CAATGTGGATGCAGACTTCC     | None          | 320            |
|               | Macaque    | ACTTGATGGGAGCACCTG       | CGATGACTCGCTGAAAGTGA     | None          | 320/ 379       |
|               | Marmoset   | AACCTTGATGGCAGCACCT      | GTTTATGCGGATGTGAATG      | None          | 420            |
|               | Mouse      | GGTCCCAAGCCTGAGTA        | CAGTAGCACCATCAAGCATC     | None          | 303            |
